# Supplementary material
Source: ML conference proceedings conference paper supplement (https://proceedings.neurips.cc/paper_files/paper/2022/hash/850e8063d902e0825d3c5504d183bafe-Abstract.html)
Supplement: Supplementary file 1 [file 850e8063d902e0825d3c5504d183bafe-Supplemental-Conference.zip]

Archive with 25 entries (20 files):
- RSA Supplementary/
- __MACOSX/._RSA Supplementary
- RSA Supplementary/.DS_Store
- __MACOSX/RSA Supplementary/._.DS_Store
- RSA Supplementary/NIPS2022_Reducing_Semantic_Shift_from_Aggressive_Augmentations_for_Self_supervised_Learning_Supplementary.pdf
- __MACOSX/RSA Supplementary/._NIPS2022_Reducing_Semantic_Shift_from_Aggressive_Augmentations_for_Self_supervised_Learning_Supplementary.pdf
- RSA Supplementary/RSA Code/
- RSA Supplementary/RSA Code/train_single.py
- RSA Supplementary/RSA Code/eval_multi.py
- RSA Supplementary/RSA Code/methods/
- RSA Supplementary/RSA Code/requirements.txt
- RSA Supplementary/RSA Code/README.md
- __MACOSX/RSA Supplementary/RSA Code/._README.md
- RSA Supplementary/RSA Code/common/
- RSA Supplementary/RSA Code/data/
- RSA Supplementary/RSA Code/train_multi.py
- RSA Supplementary/RSA Code/eval_single.py
- RSA Supplementary/RSA Code/methods/MSR.py
- RSA Supplementary/RSA Code/methods/__init__.py
- RSA Supplementary/RSA Code/methods/AbstractMethod.py
- RSA Supplementary/RSA Code/methods/BYOL.py
- RSA Supplementary/RSA Code/common/LmdbDataset.py
- RSA Supplementary/RSA Code/common/tools.py
- RSA Supplementary/RSA Code/common/lars.py
- RSA Supplementary/RSA Code/common/augments.py
