# Supplementary material
Source: ML conference proceedings conference paper supplement (https://proceedings.neurips.cc/paper_files/paper/2022/hash/850e8063d902e0825d3c5504d183bafe-Abstract.html)
Supplement: Supplementary file 1 [file 850e8063d902e0825d3c5504d183bafe-Supplemental-Conference.zip › RSA Supplementary/RSA Code/common/lars.py]

import torch
from torch import nn
from torch.nn.parameter import Parameter


class LARC(object):

    def __init__(self, optimizer, trust_coefficient=0.02, clip=True, eps=1e-8):
        self.optim = optimizer
        self.trust_coefficient = trust_coefficient
        self.eps = eps
        self.clip = clip

    def __getstate__(self):
        return self.optim.__getstate__()

    def __setstate__(self, state):
        self.optim.__setstate__(state)

    @property
    def state(self):
        return self.optim.state

    def __repr__(self):
        return self.optim.__repr__()

    @property
    def param_groups(self):
        return self.optim.param_groups

    @param_groups.setter
    def param_groups(self, value):
        self.optim.param_groups = value

    def state_dict(self):
        return self.optim.state_dict()

    def load_state_dict(self, state_dict):
        self.optim.load_state_dict(state_dict)

    def zero_grad(self):
        self.optim.zero_grad()

    def add_param_group(self, param_group):
        self.optim.add_param_group(param_group)

    def step(self):
        with torch.no_grad():
            weight_decays = []
            for group in self.optim.param_groups:
                # absorb weight decay control from optimizer
                weight_decay = group['weight_decay'] if 'weight_decay' in group else 0
                weight_decays.append(weight_decay)
                group['weight_decay'] = 0
                for p in group['params']:
                    if p.grad is None:
                        continue
                    param_norm = torch.norm(p.data)
                    grad_norm = torch.norm(p.grad.data)

                    if param_norm != 0 and grad_norm != 0:
                        # calculate adaptive lr + weight decay
                        adaptive_lr = self.trust_coefficient * (param_norm) / (grad_norm + param_norm * weight_decay + self.eps)

                        # clip learning rate for LARC
                        if self.clip:
                            # calculation of adaptive_lr so that when multiplied by lr it equals `min(adaptive_lr, lr)`
                            adaptive_lr = min(adaptive_lr/group['lr'], 1)

                        p.grad.data += weight_decay * p.data
                        p.grad.data *= adaptive_lr

        self.optim.step()
        # return weight decay control to optimizer
        for i, group in enumerate(self.optim.param_groups):
            group['weight_decay'] = weight_decays[i]


class LARS(torch.optim.Optimizer):
    """
    LARS optimizer, no rate scaling or weight decay for parameters <= 1D.
    """

    def __init__(self, params, lr=0, weight_decay=0, momentum=0.9, trust_coefficient=0.001):
        defaults = dict(lr=lr, weight_decay=weight_decay, momentum=momentum, trust_coefficient=trust_coefficient)
        super().__init__(params, defaults)

    @torch.no_grad()
    def step(self):
        for g in self.param_groups:
            for p in g['params']:
                dp = p.grad

                if dp is None:
                    continue

                if p.ndim > 1:  # if not normalization gamma/beta or bias
                    dp = dp.add(p, alpha=g['weight_decay'])
                    param_norm = torch.norm(p)
                    update_norm = torch.norm(dp)
                    one = torch.ones_like(param_norm)
                    q = torch.where(param_norm > 0.,
                                    torch.where(update_norm > 0,
                                                (g['trust_coefficient'] * param_norm / update_norm), one),
                                    one)
                    dp = dp.mul(q)

                param_state = self.state[p]
                if 'mu' not in param_state:
                    param_state['mu'] = torch.zeros_like(p)
                mu = param_state['mu']
                mu.mul_(g['momentum']).add_(dp)
                p.add_(mu, alpha=-g['lr'])
