# Supplementary material
Source: ML conference proceedings conference paper supplement (https://proceedings.neurips.cc/paper_files/paper/2022/hash/850e8063d902e0825d3c5504d183bafe-Abstract.html)
Supplement: Supplementary file 1 [file 850e8063d902e0825d3c5504d183bafe-Supplemental-Conference.zip › RSA Supplementary/RSA Code/methods/__init__.py]

from .BYOL import BYOL
from .MSR import MSR


METHOD_LIST = ["byol", "msr"]


def create_method(args):
    assert args.method in METHOD_LIST

    if args.method == 'byol':
        model = BYOL(args.arch, args.max_step)
    elif args.method == 'msr':
        model = MSR(args.arch, max_step=args.max_step, beta=args.beta)

    return model
