# Supplementary material
Source: ML conference proceedings conference paper supplement (https://proceedings.neurips.cc/paper_files/paper/2022/hash/850e8063d902e0825d3c5504d183bafe-Abstract.html)
Supplement: Supplementary file 1 [file 850e8063d902e0825d3c5504d183bafe-Supplemental-Conference.zip › RSA Supplementary/RSA Code/README.md]

# RSA


## Experiments

To install requirements:

```setup
pip install -r requirements.txt
```

> 📋 Please download and place all datasets into the data directory. Note that our train program will invoke the linear evaluation by default.


To train RSA on CIFAR-10

```
python train_single.py --dataset cifar100 --beta 0.3
```

To train RSA on STL-10

```
python train_single.py --dataset stl10
```


To train RSA on ImageNet-100

```
python train_multi.py --dataset ImageNet-100 --data_root data/ImageNet-100/
```


To train RSA on ImageNet-1K

```
python train_multi.py --dataset ImageNet --lr 0.6 --wd 1e-6 --batch-size 2048 --warmup-epochs 10 --data_root data/ImageNet/
```
