# Supplementary material
Source: ML conference proceedings conference paper supplement (https://proceedings.neurips.cc/paper_files/paper/2022/hash/850e8063d902e0825d3c5504d183bafe-Abstract.html)
Supplement: Supplementary file 1 [file 850e8063d902e0825d3c5504d183bafe-Supplemental-Conference.zip › RSA Supplementary/RSA Code/requirements.txt]

torch==1.8.1
torchvision==0.9.1
